# Supplementary material for: Aliphatic polycarbonates and poly(ester carbonate)s from fatty acid derived monomers
Source: Royal Society of Chemistry journal article supplement (doi:10.1039/c1py00326g), 2011-01-01
Supplement: c1py00326g.pdf [file c1py00326g.pdf]

# Supporting Information for

## Aliphatic Polycarbonates and Poly(ester carbonate)s from Fatty Acid Derived Monomers

*Arvind S. More,<sup>a,b</sup> Dnyaneshwar V. Palaskar,<sup>a,b</sup> Eric Cloutet,<sup>a,b</sup> Benoit Gadenne,<sup>c</sup> Carine Alfos,<sup>c</sup> and Henri Cramail\*<sup>a,b</sup>*

<sup>a</sup>Université de Bordeaux, Laboratoire de Chimie des Polymères Organiques, UMR 5629, IPB/ENSCBP, 16 avenue Pey-Berland, F-33607, Pessac cedex, France.

<sup>b</sup>Centre National de la Recherche Scientifique, Laboratoire de Chimie des Polymères Organiques, F-33607, Pessac cedex, France.

<sup>c</sup>ITERG, 11 rue Gaspard Monge, Parc Industriel, Pessac Cedex, F-33600, France.

Corresponding author. e-mail address: [cramail@enscbp.fr](mailto:cramail@enscbp.fr)

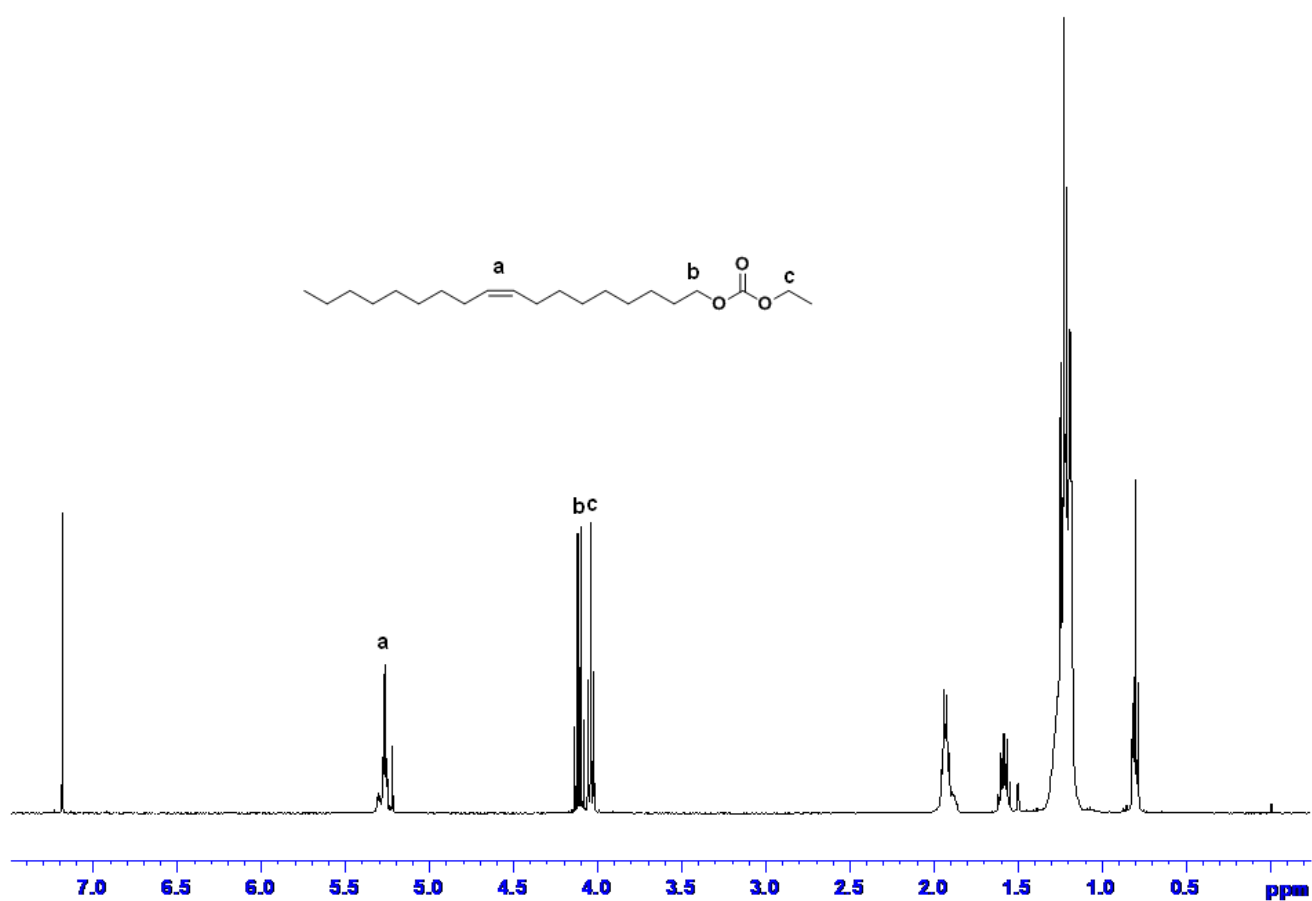

Figure S1. <sup>1</sup>H-NMR spectrum of Oleyl Carbonate

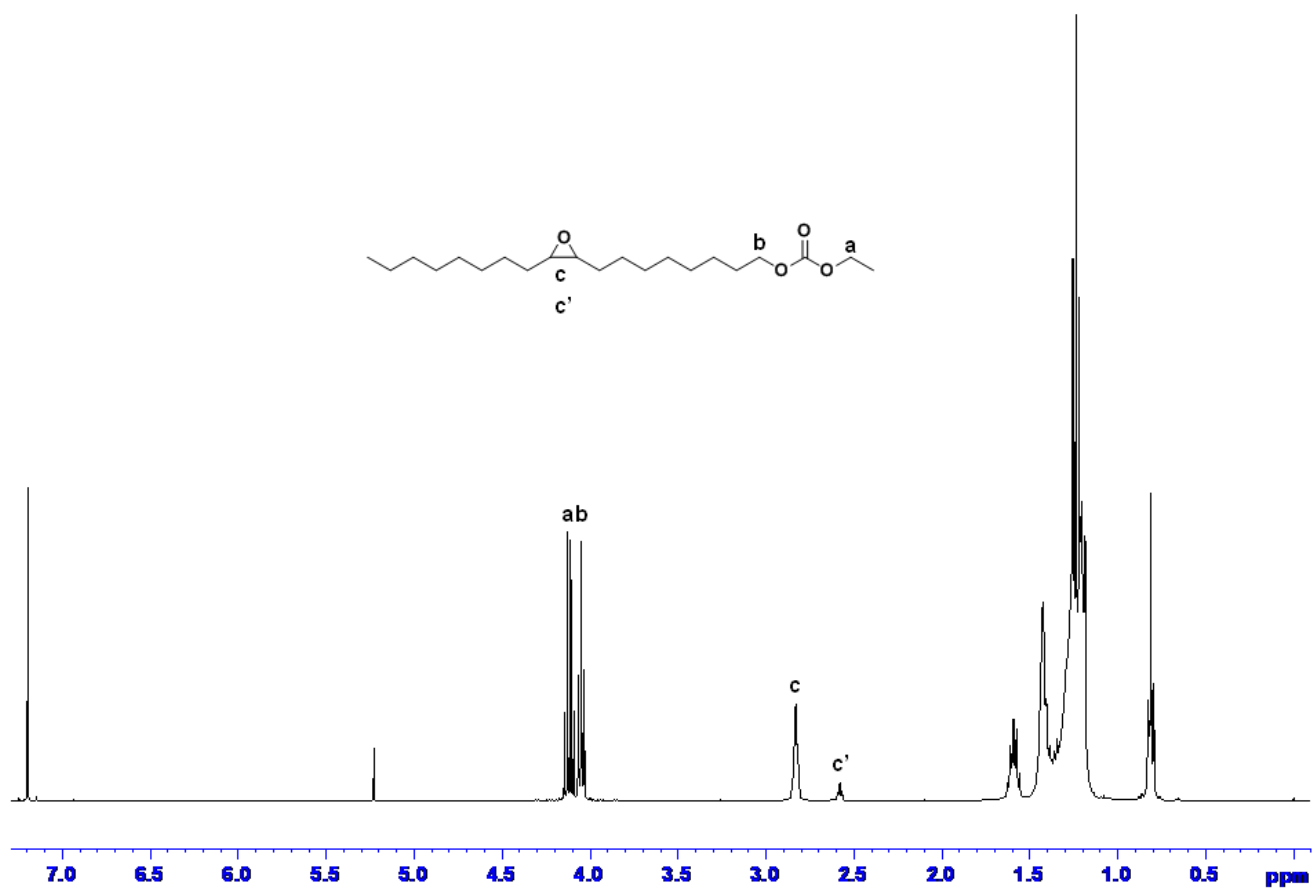

**Figure S2.** <sup>1</sup>H-NMR spectrum of Epoxidised Oleyl Carbonate

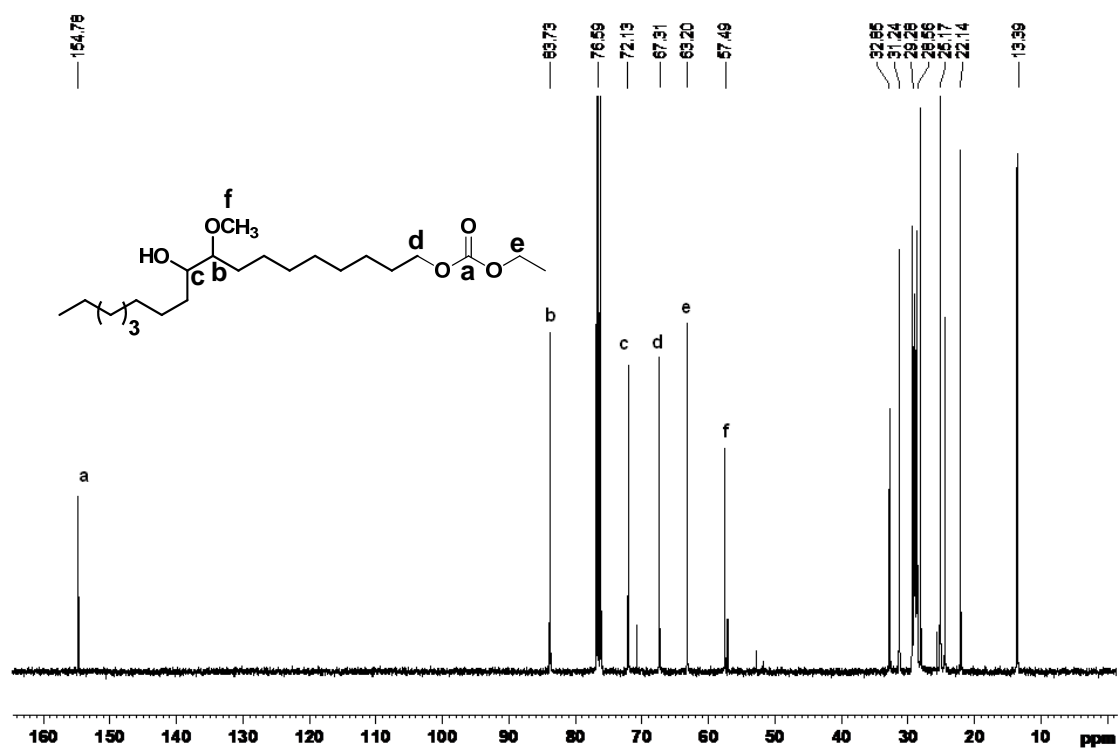

**Figure S3.** <sup>13</sup>C-NMR spectrum of ethyl(10(9)-hydroxy-9(10)-methoxy octadecyl)carbonate (EHMOC, 4/4') (AB-self condensable monomer)

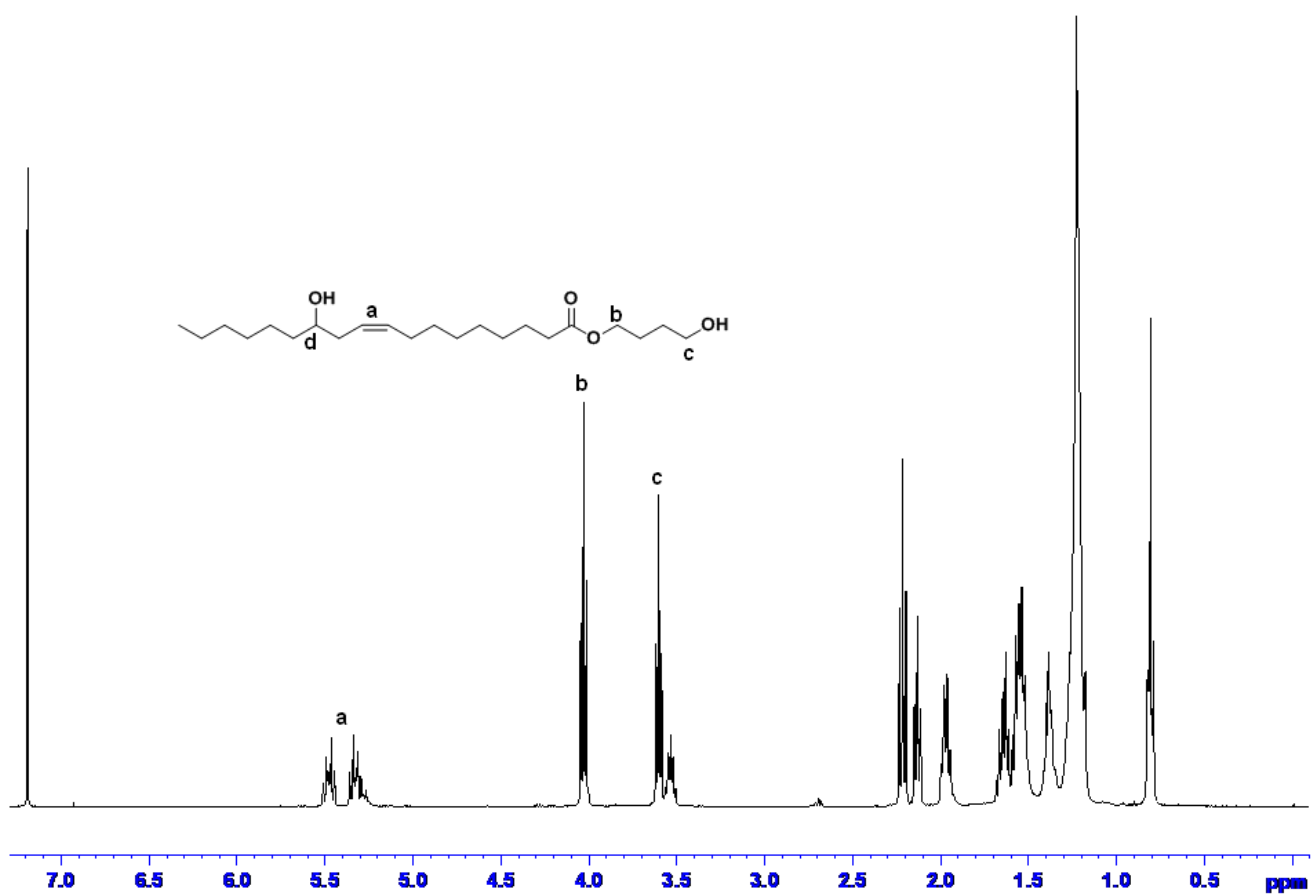

**Figure S4.** <sup>1</sup>H-NMR spectrum of 4-Hydroxybutyl-12-hydroxyoctadec-9-enoate (HBHOE)



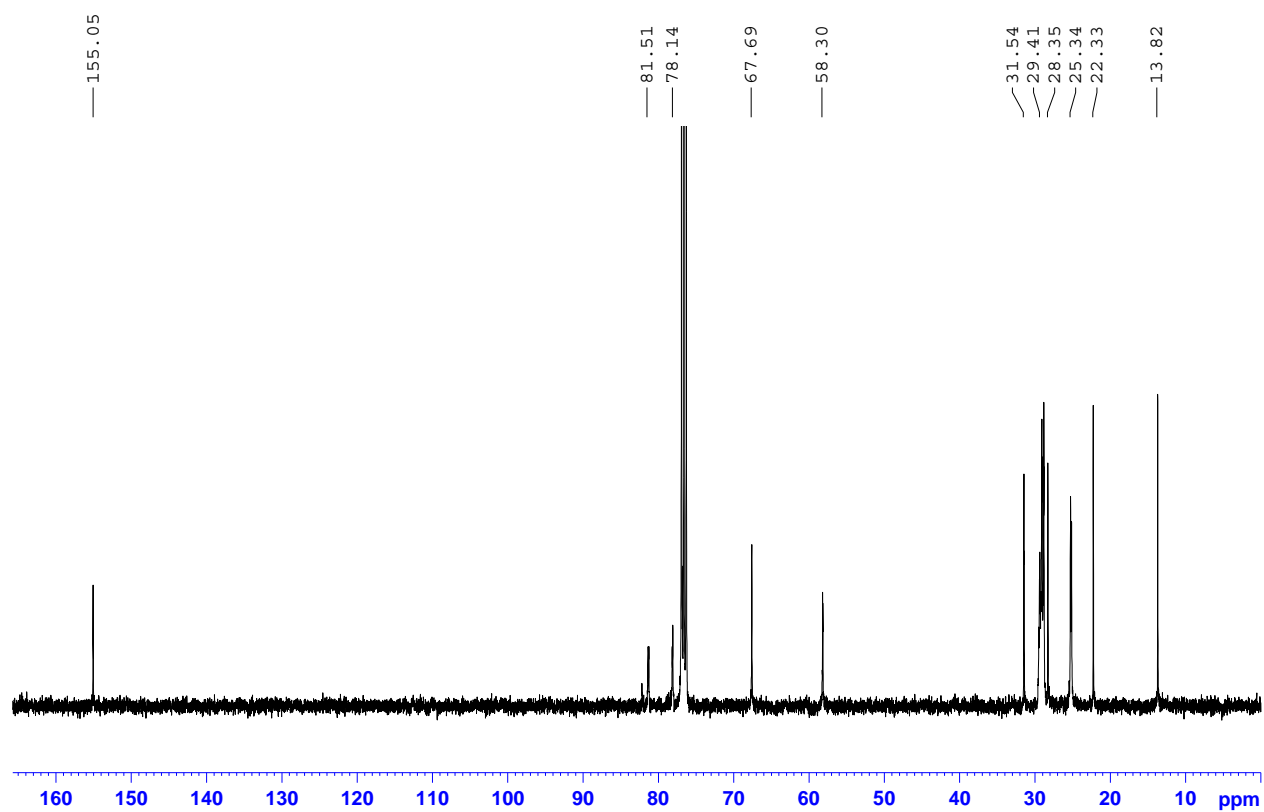

**Figure S6.**  $^{13}\text{C}$ -NMR spectrum polycarbonate (PC-I) derived by self polycondensation of EHMOC

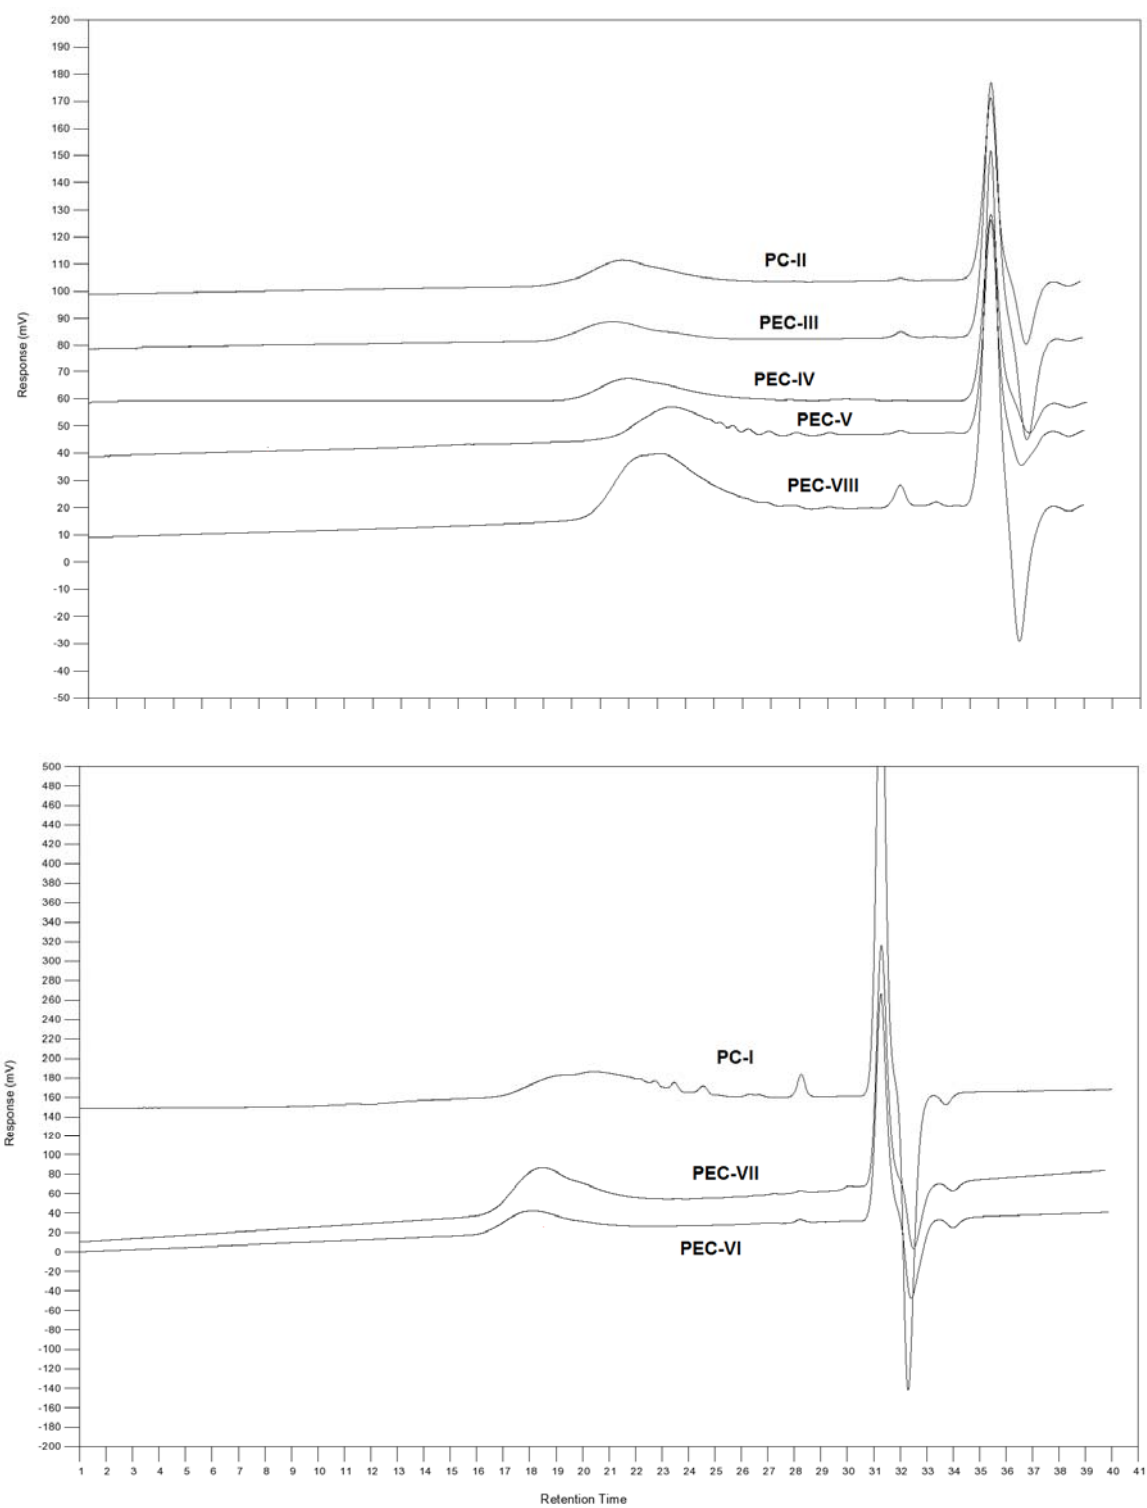

**Figure S7.** SEC traces of polycarbonates and poly(ester carbonate)s



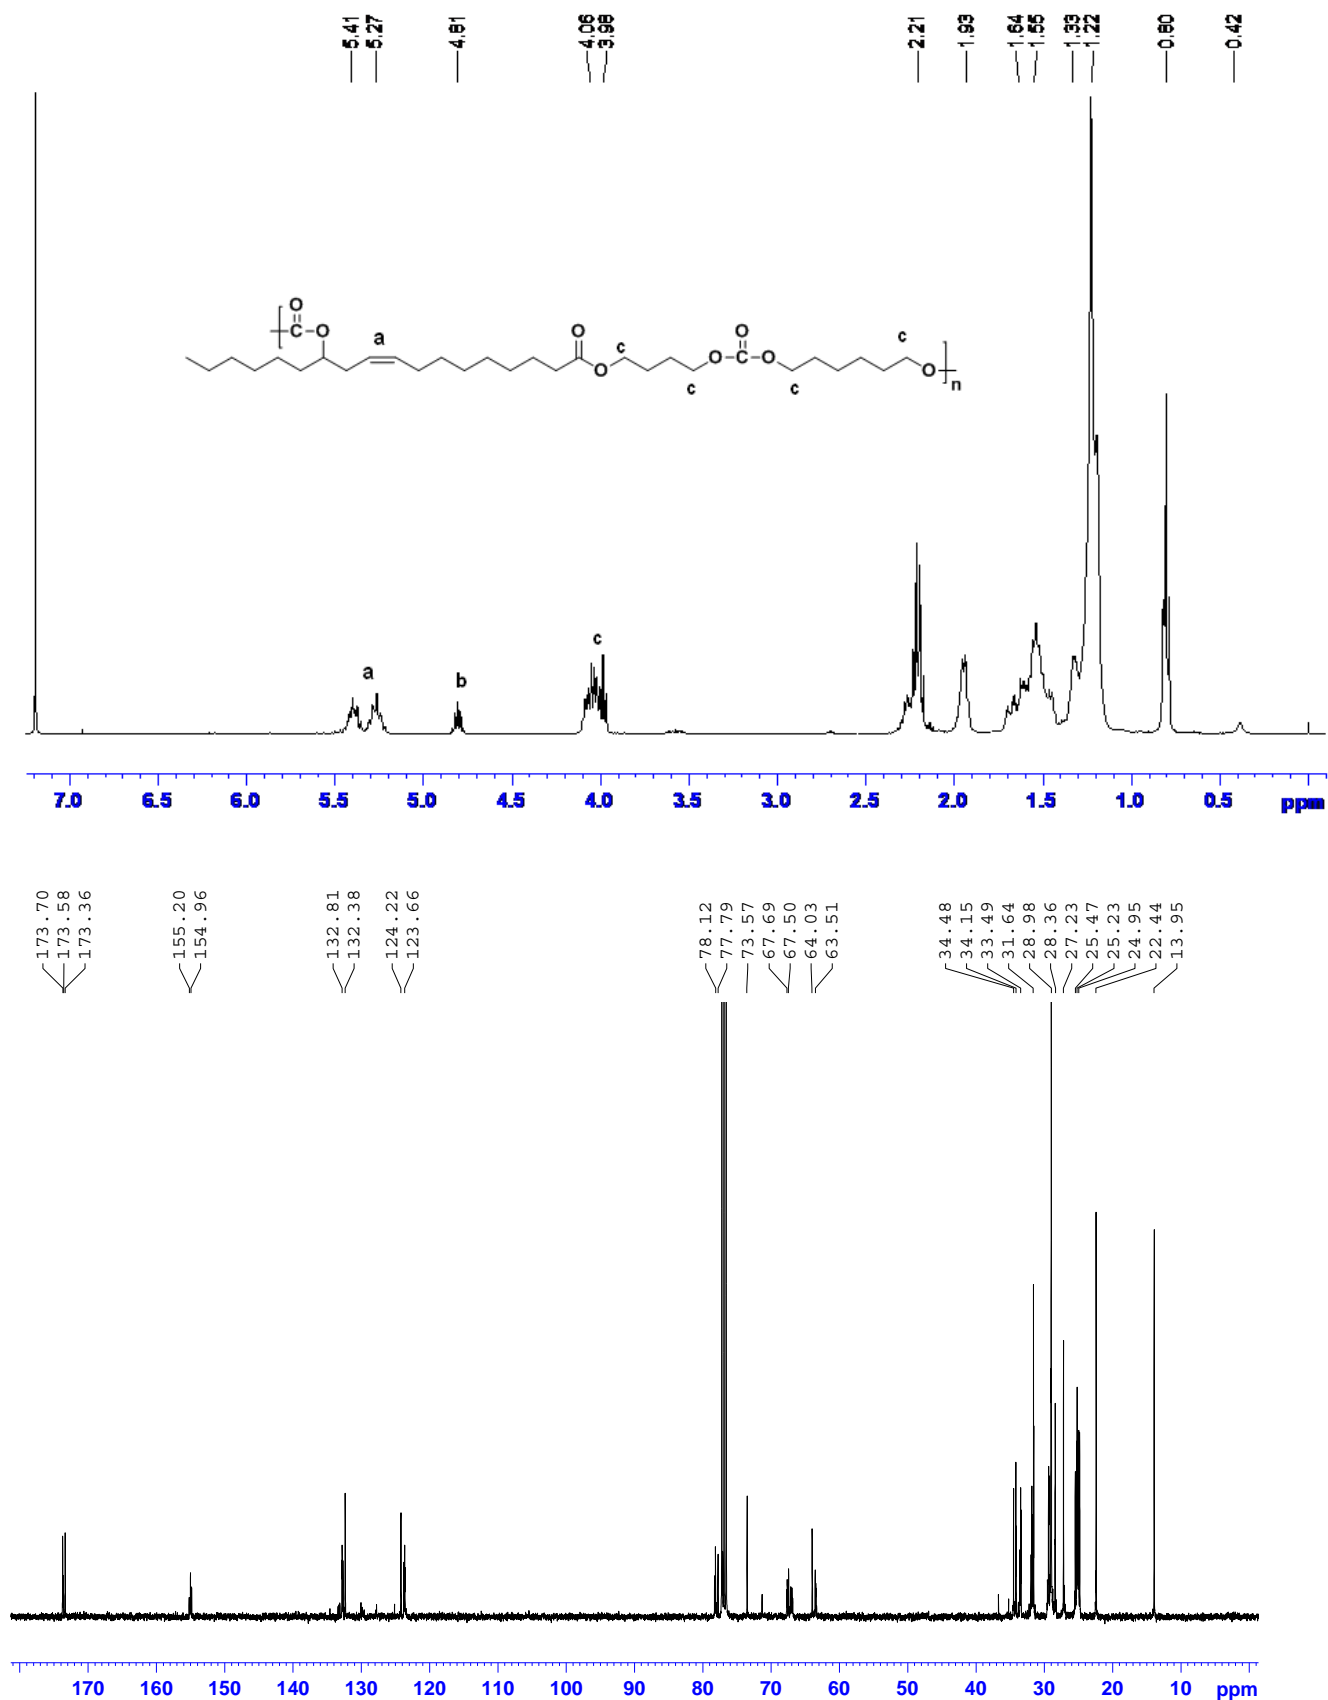

**Figure S8.**  $^1\text{H}$  and  $^{13}\text{C}$ -NMR spectra of poly(ester carbonate) (PEC-III) derived by polycondensation of EOBEOE and Hexanediol

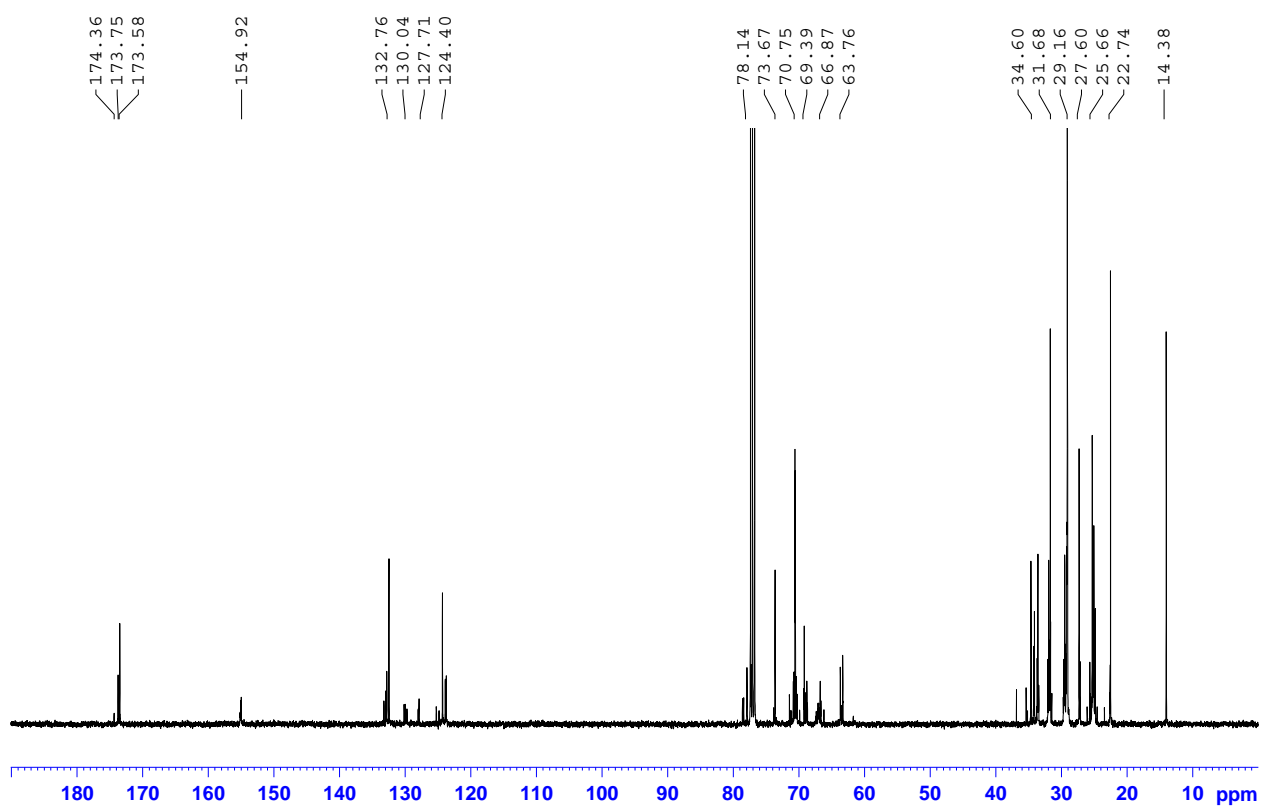

**Figure S9.**  $^{13}\text{C}$ -NMR spectrum of poly(ester carbonate) (PEC-IV) derived by polycondensation of EOBEOE and PEG200

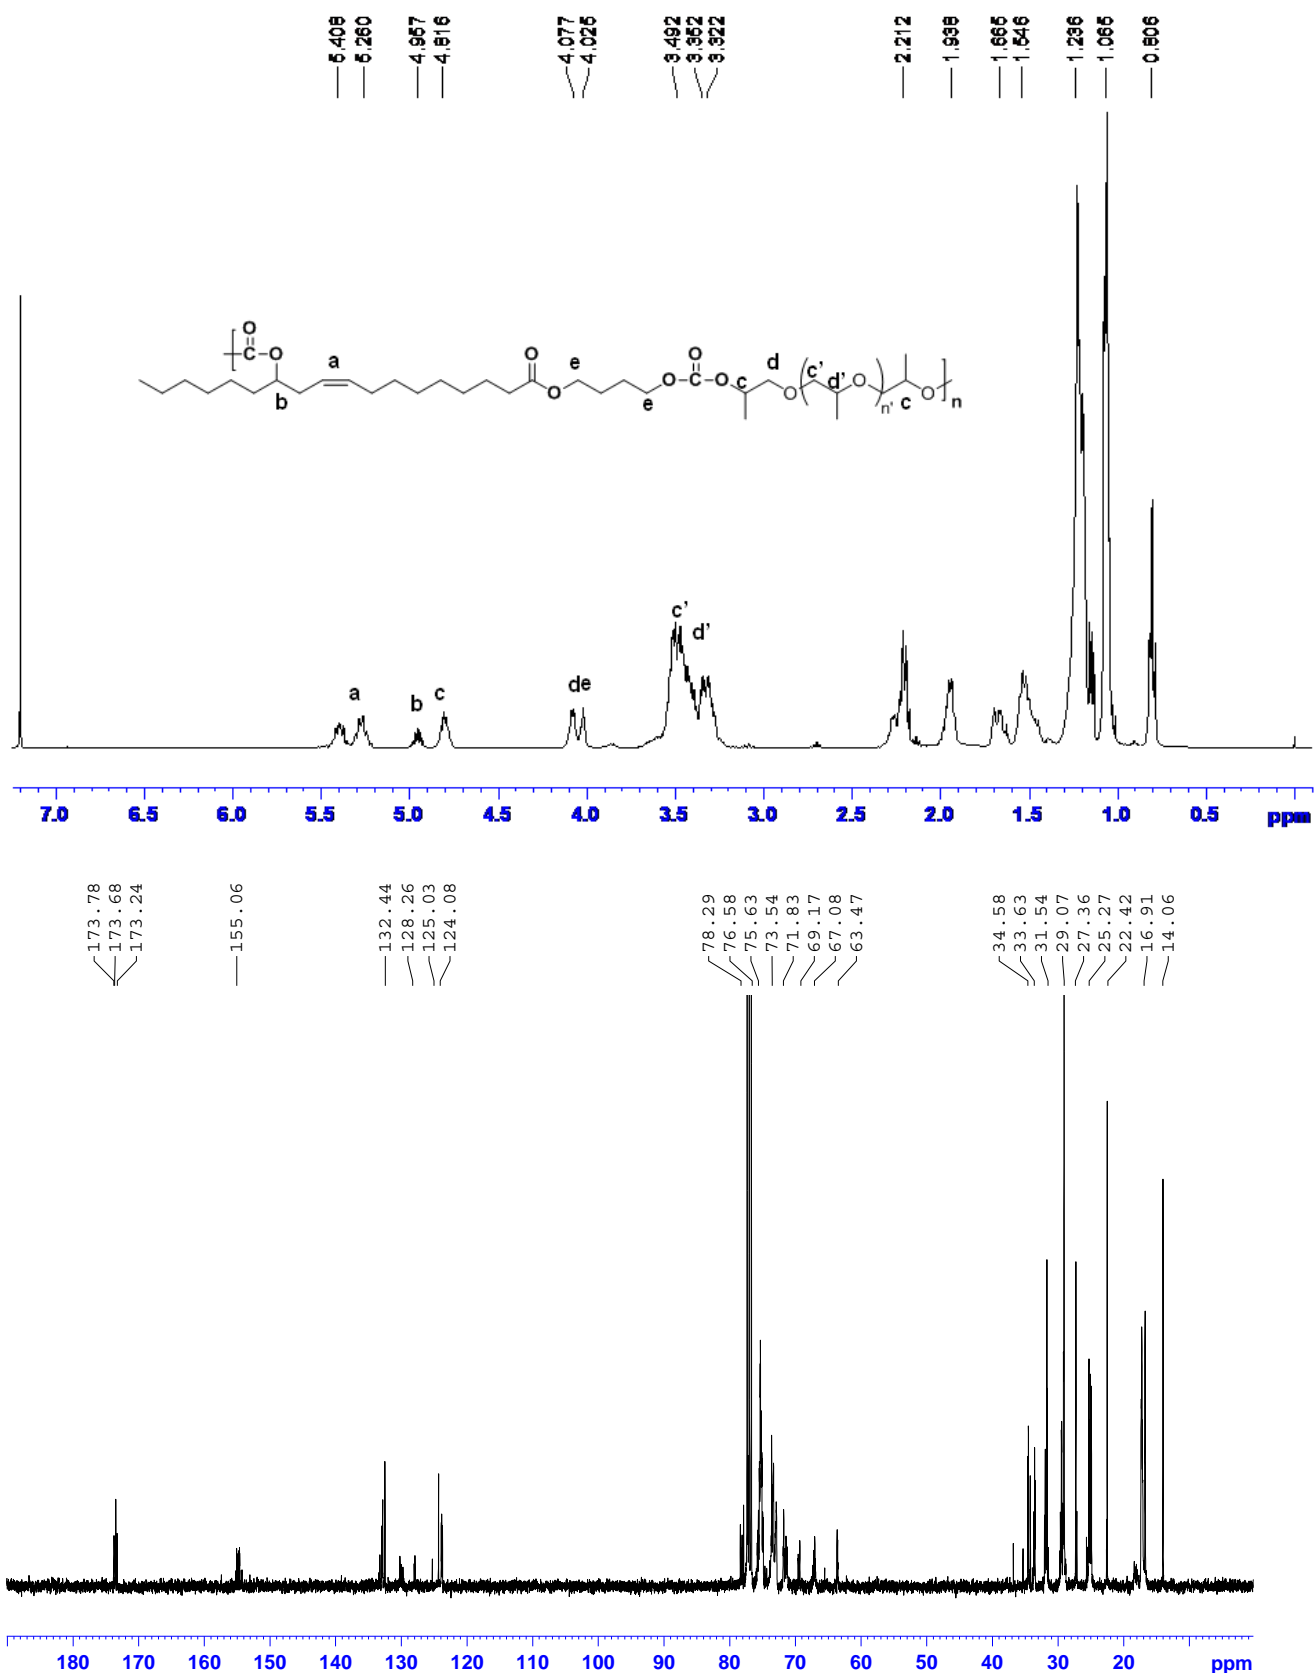

**Figure S10.**  $^1\text{H}$  and  $^{13}\text{C}$ -NMR spectra of poly(ester carbonate) (PEC-V) derived by polycondensation of EOBEOE and PPG400

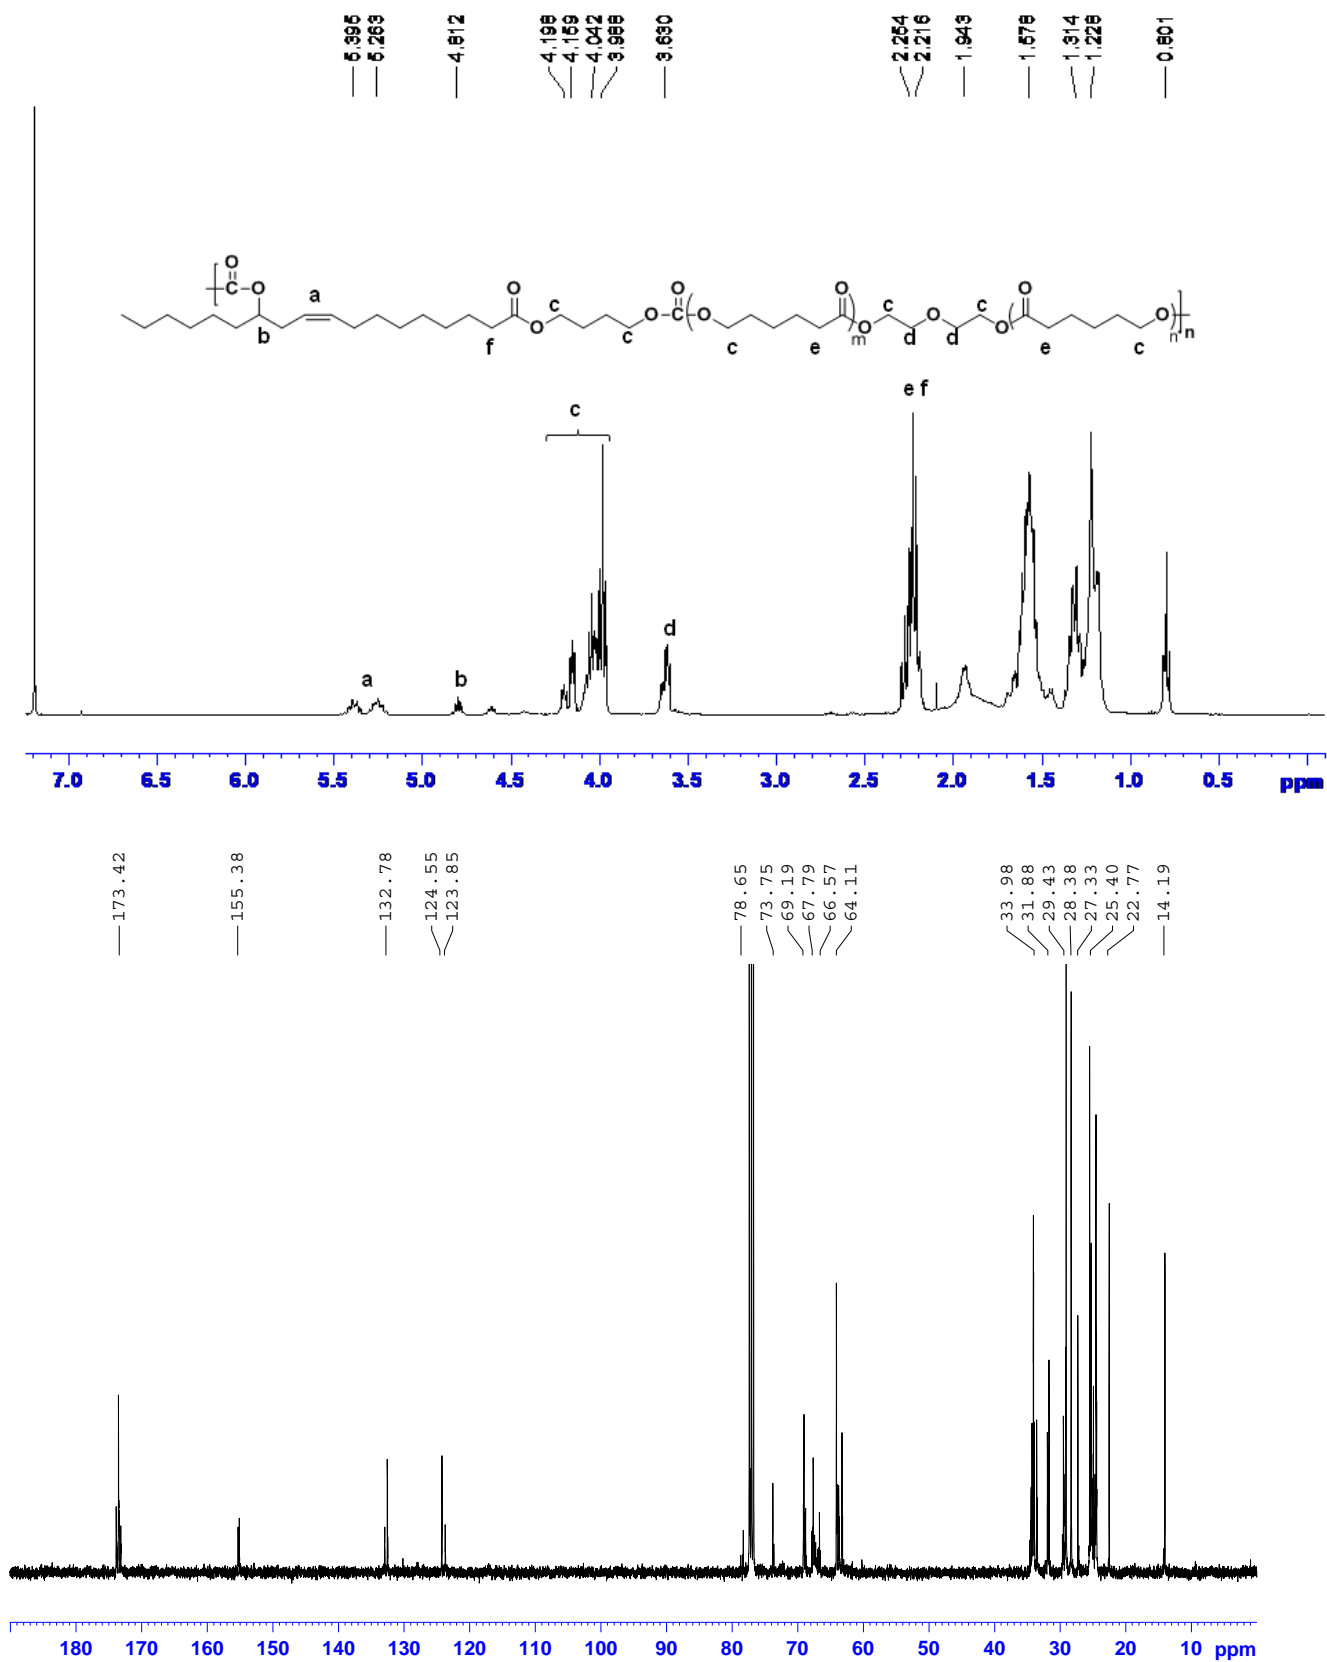

**Figure S11.**  $^1\text{H}$  and  $^{13}\text{C}$ -NMR spectra of poly(ester carbonate) (PEC-VI) derived by polycondensation of EOBEOE and PCL1250

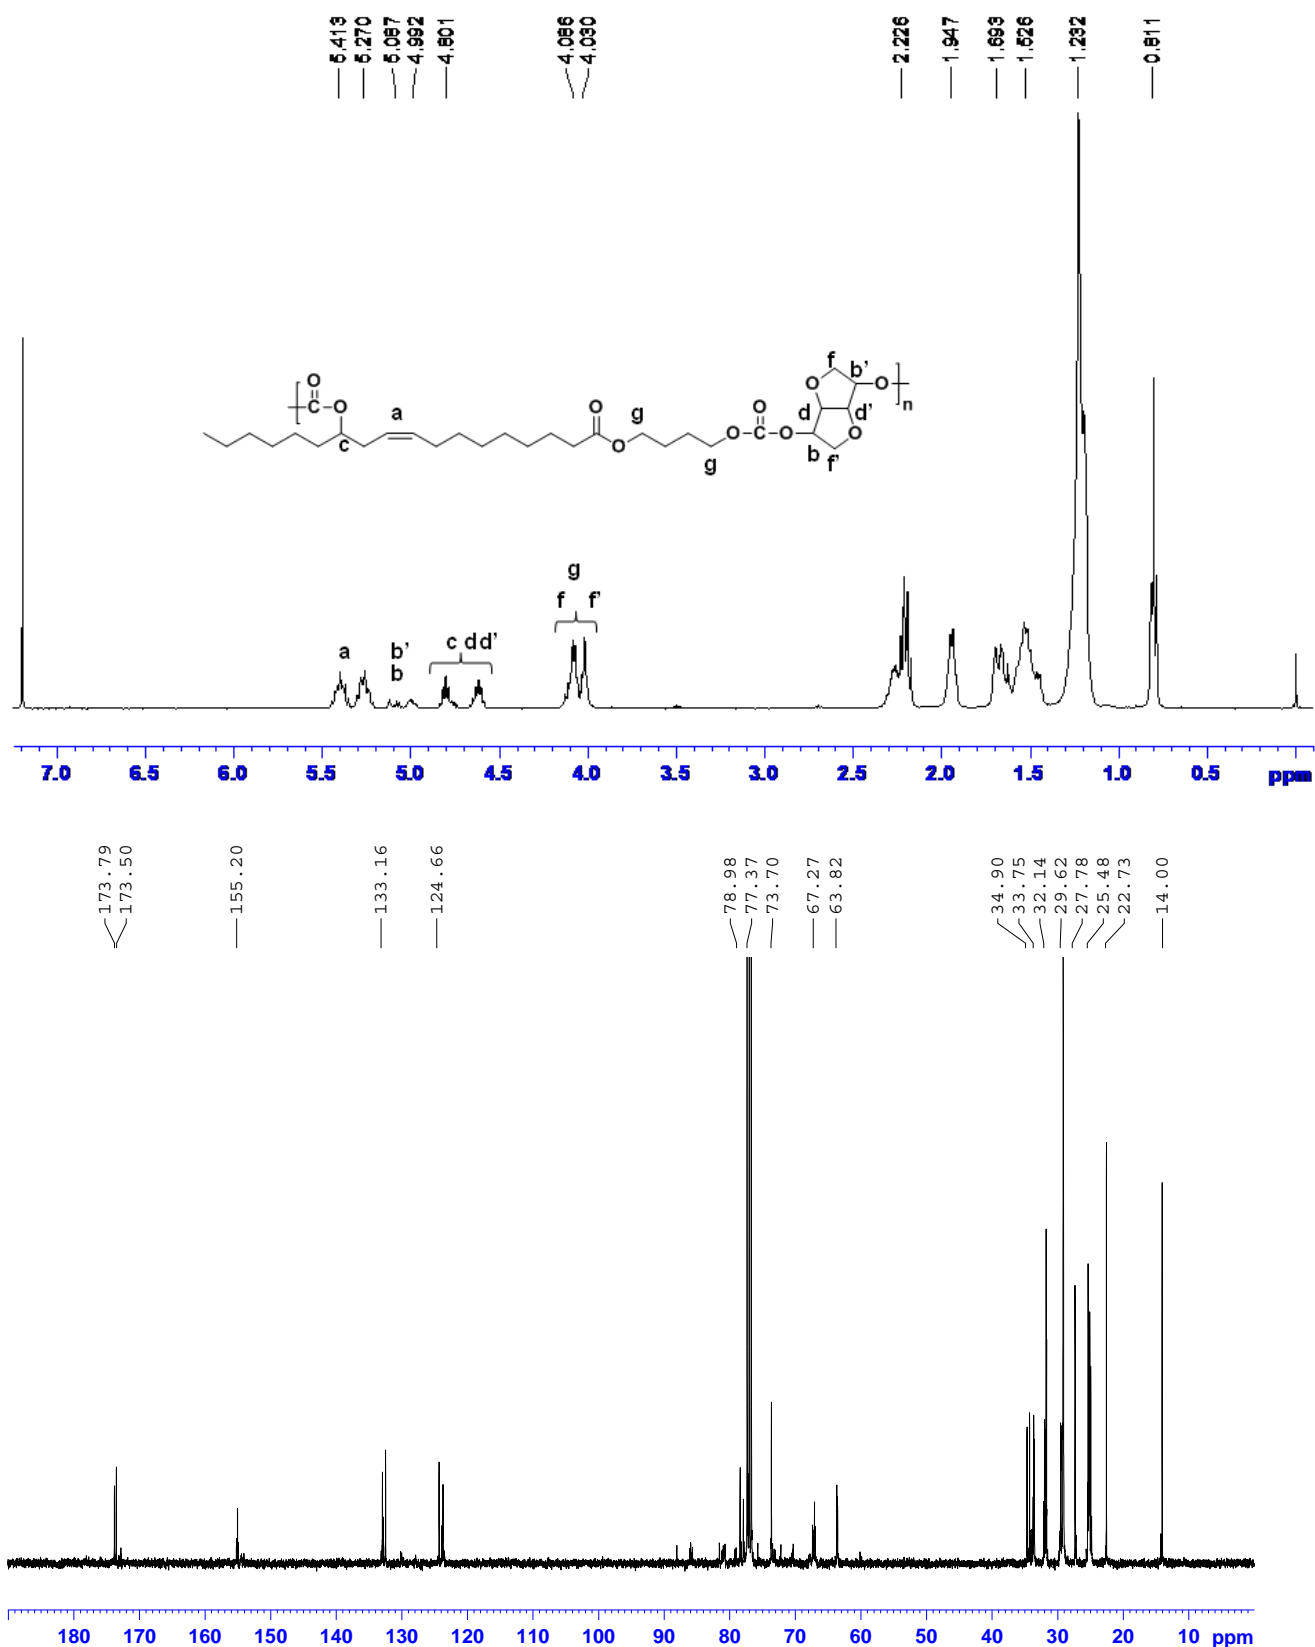

**Figure S12.**  $^1\text{H}$  and  $^{13}\text{C}$ -NMR spectra of poly(ester carbonate) (PEC-VII) derived by polycondensation of EOBEOE and Isosorbide

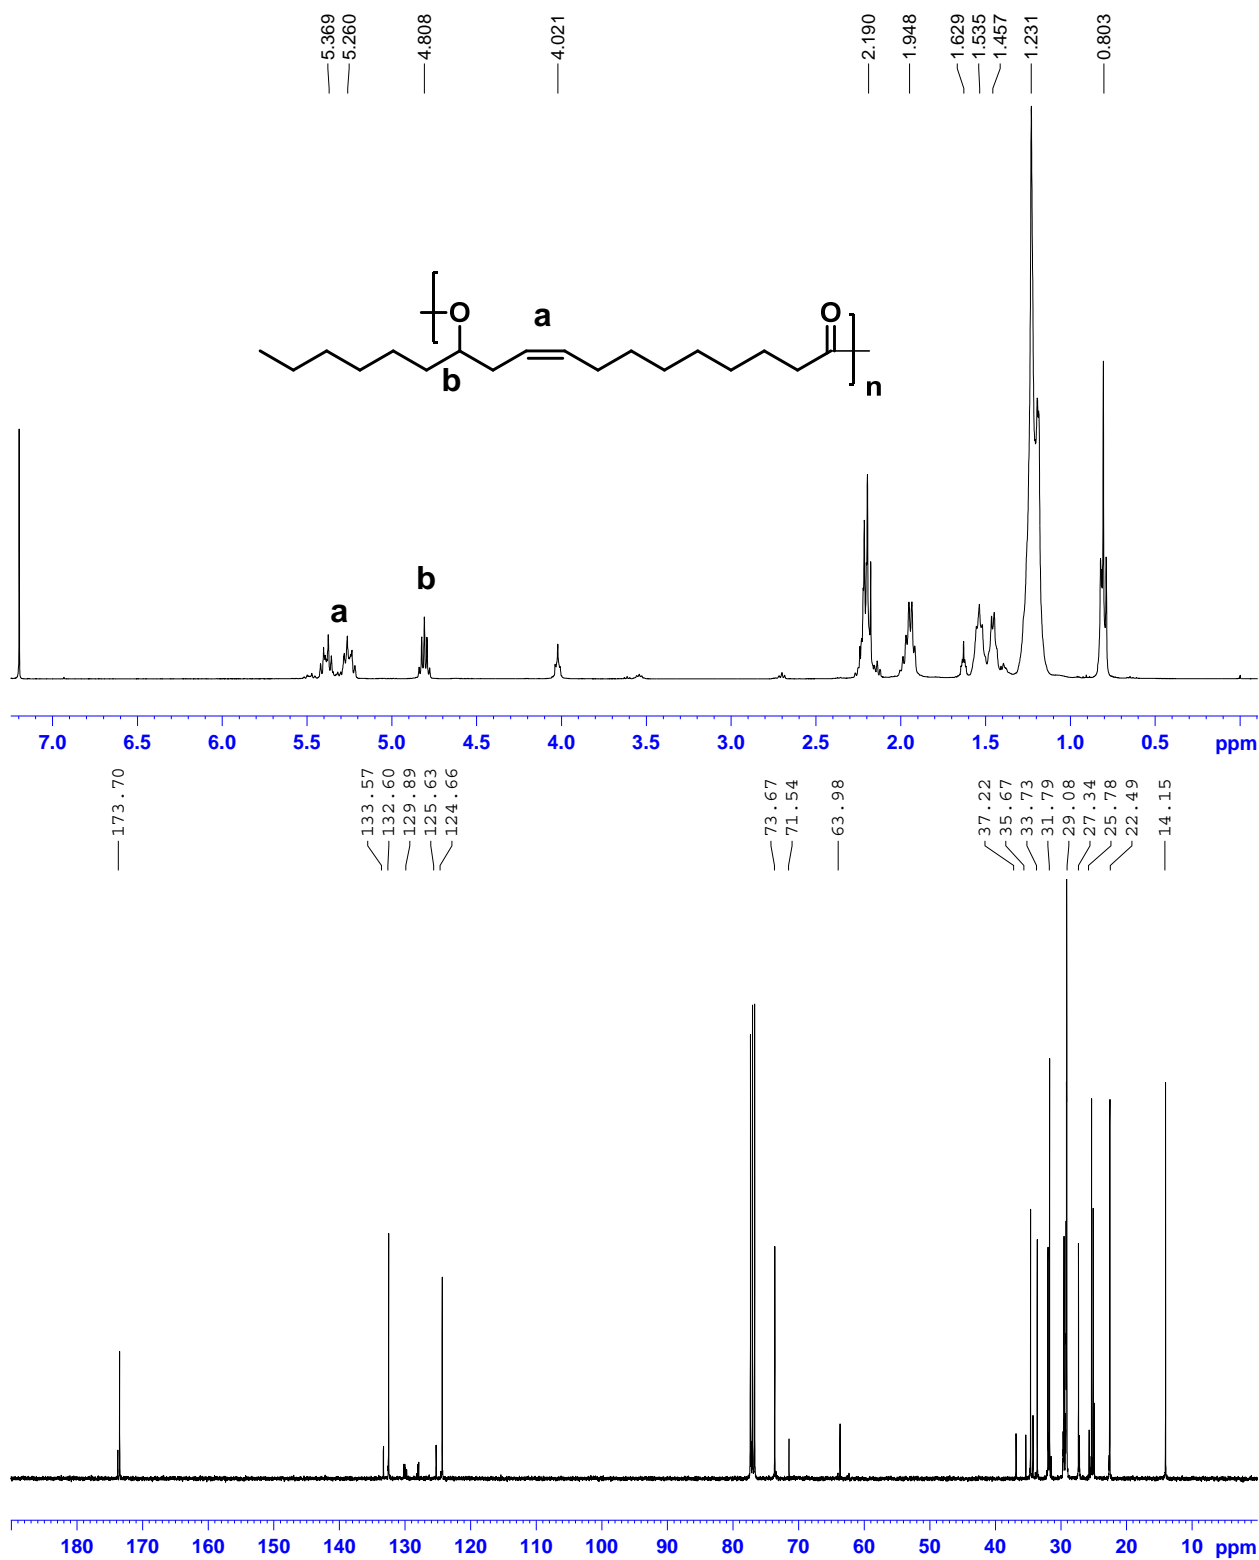

**Figure S13.**  $^1\text{H}$  and  $^{13}\text{C}$ -NMR spectra of PEC-VIII derived by polycondensation of HBHOE and DEC

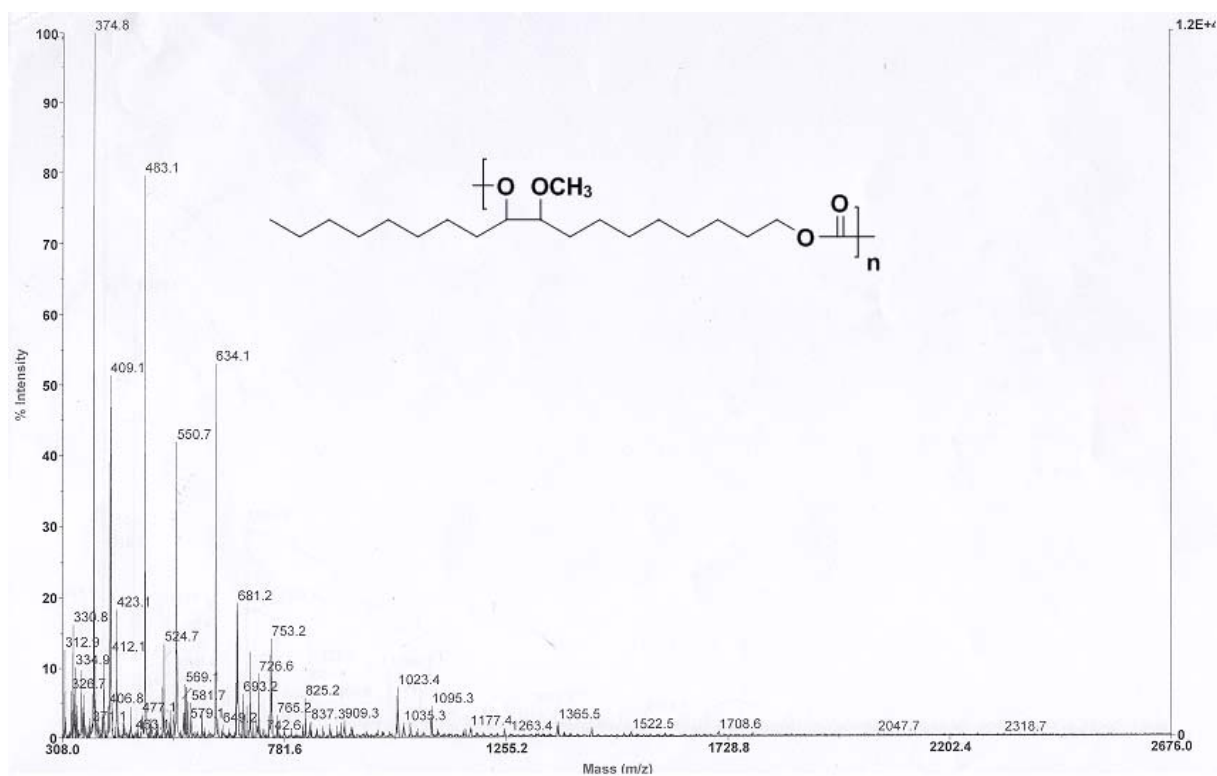

**Figure S14.** MALDI-TOF mass spectrum of polycarbonate (PC-I) derived by self-polycondensation of EHMOC

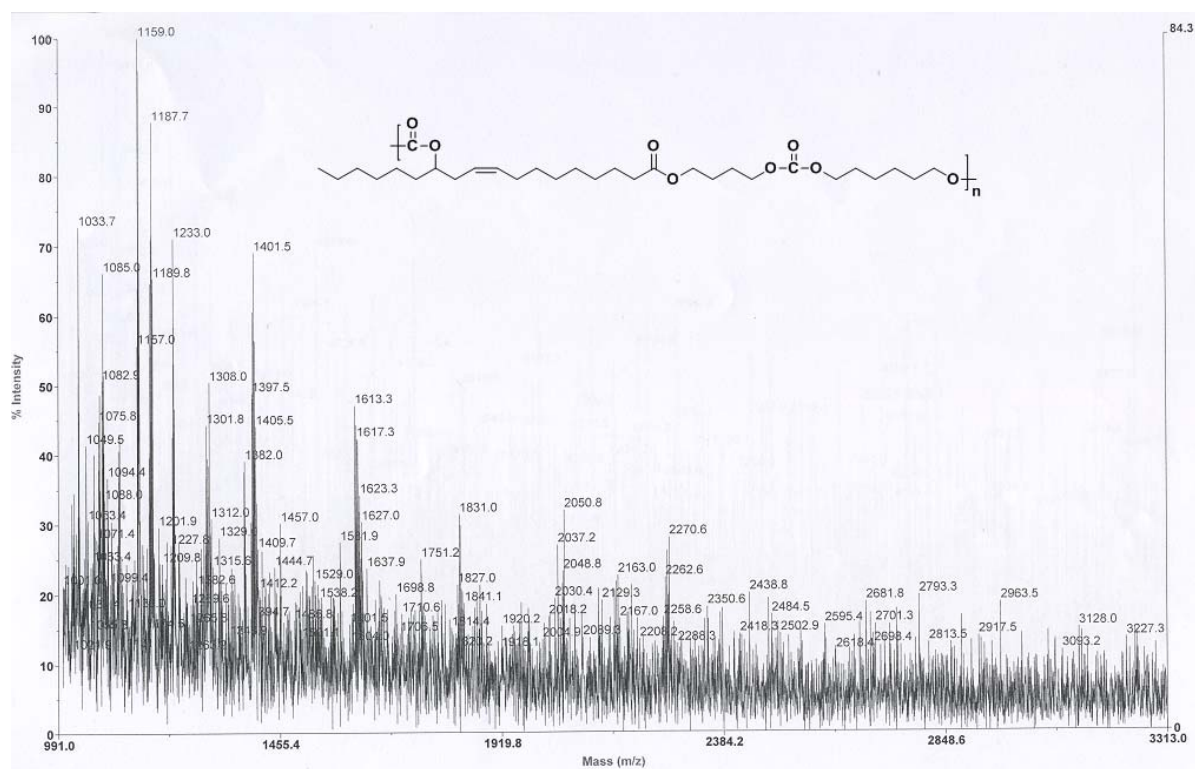

**Figure S15.** MALDI-TOF mass spectrum of poly(ester carbonate) (PEC-III) derived by polycondensation of EOBEOE and Hexanediol



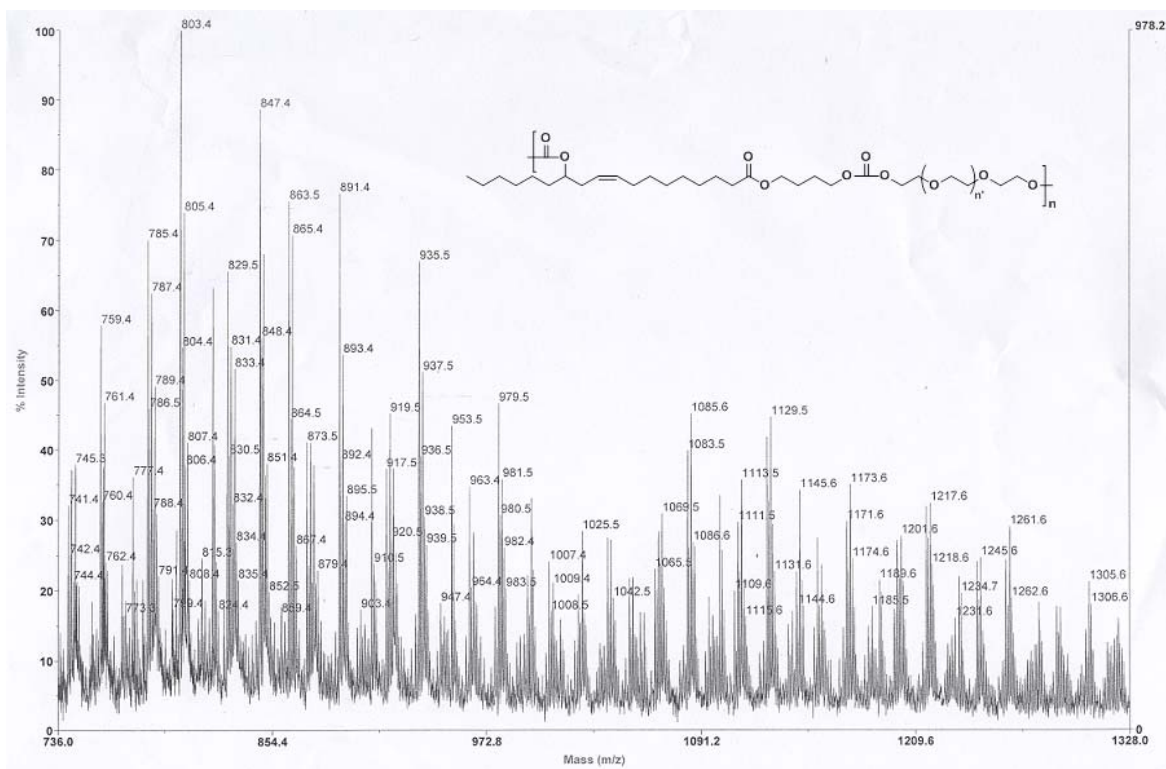

**Figure S16.** MALDI-TOF mass spectrum of poly(ester carbonate) (PEC-IV) derived by polycondensation of EOBE OE and PEG200

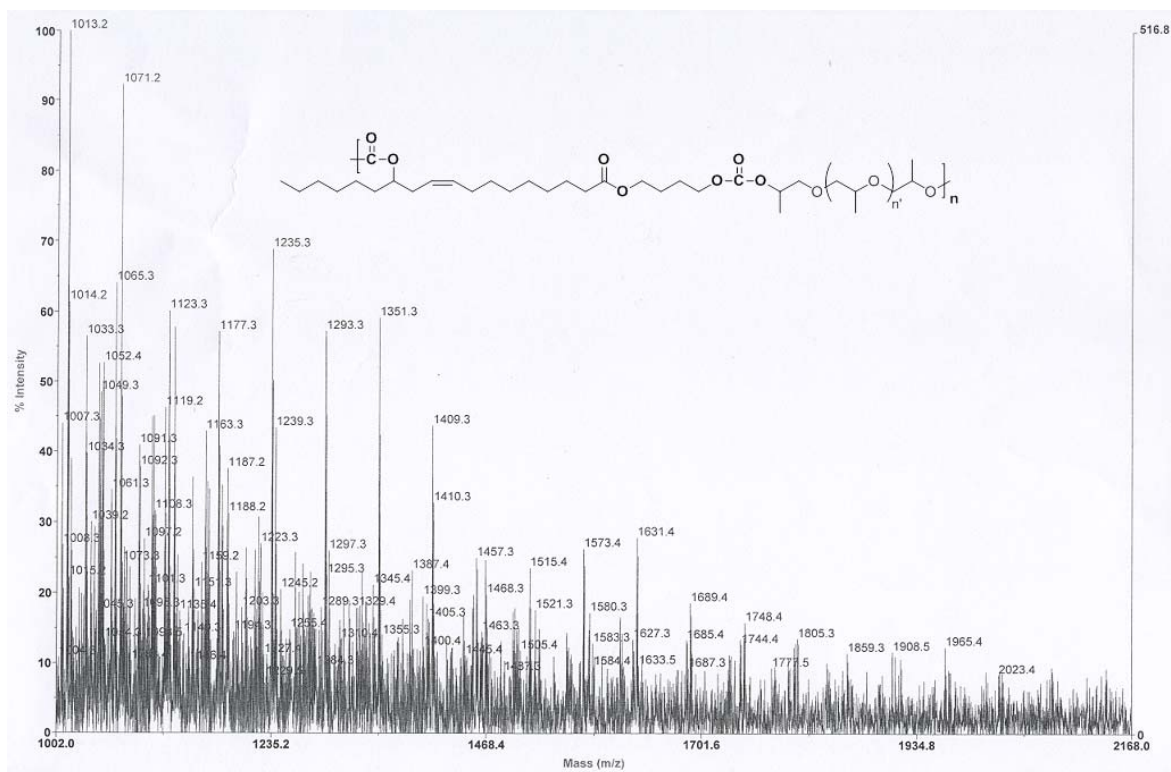

**Figure S17.** MALDI-TOF mass spectrum of poly(ester carbonate) (PEC-V) derived by polycondensation of EOBE OE and PPG400

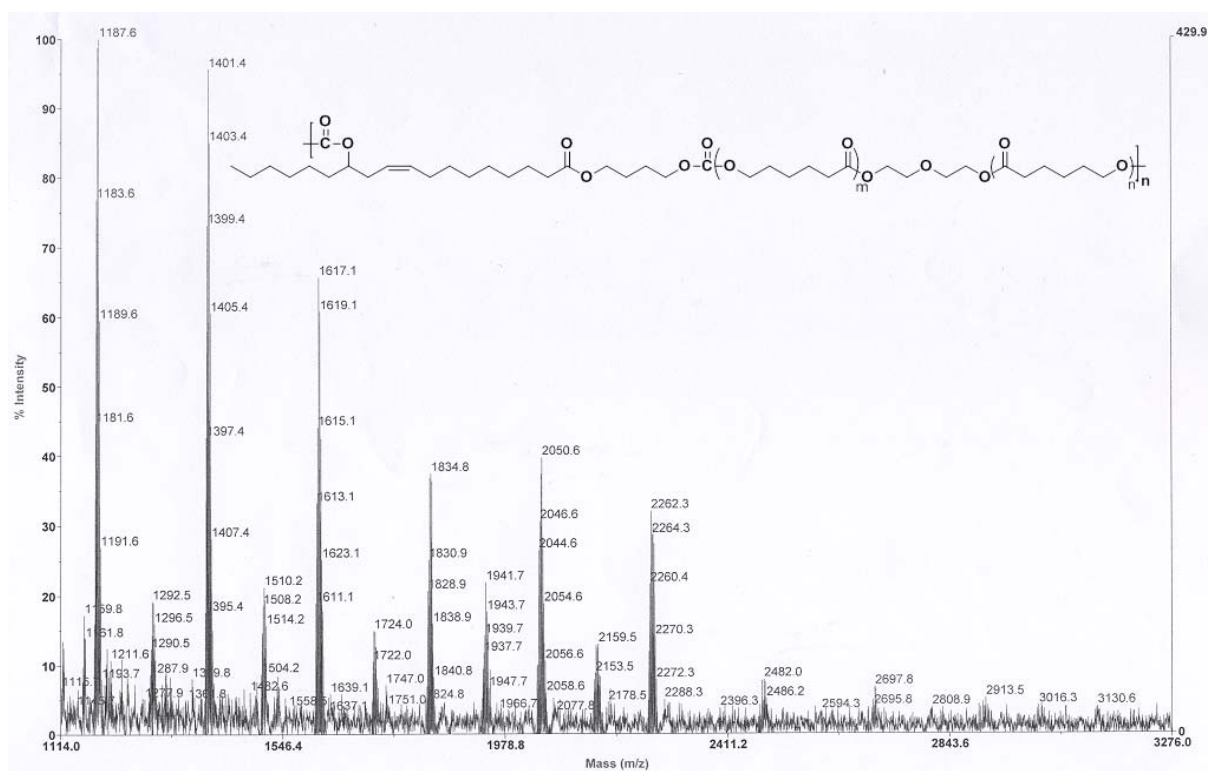

**Figure S18.** MALDI-TOF mass spectrum of poly(ester carbonate) (PEC-VI) derived by polycondensation of EOBE OE and PCL1250

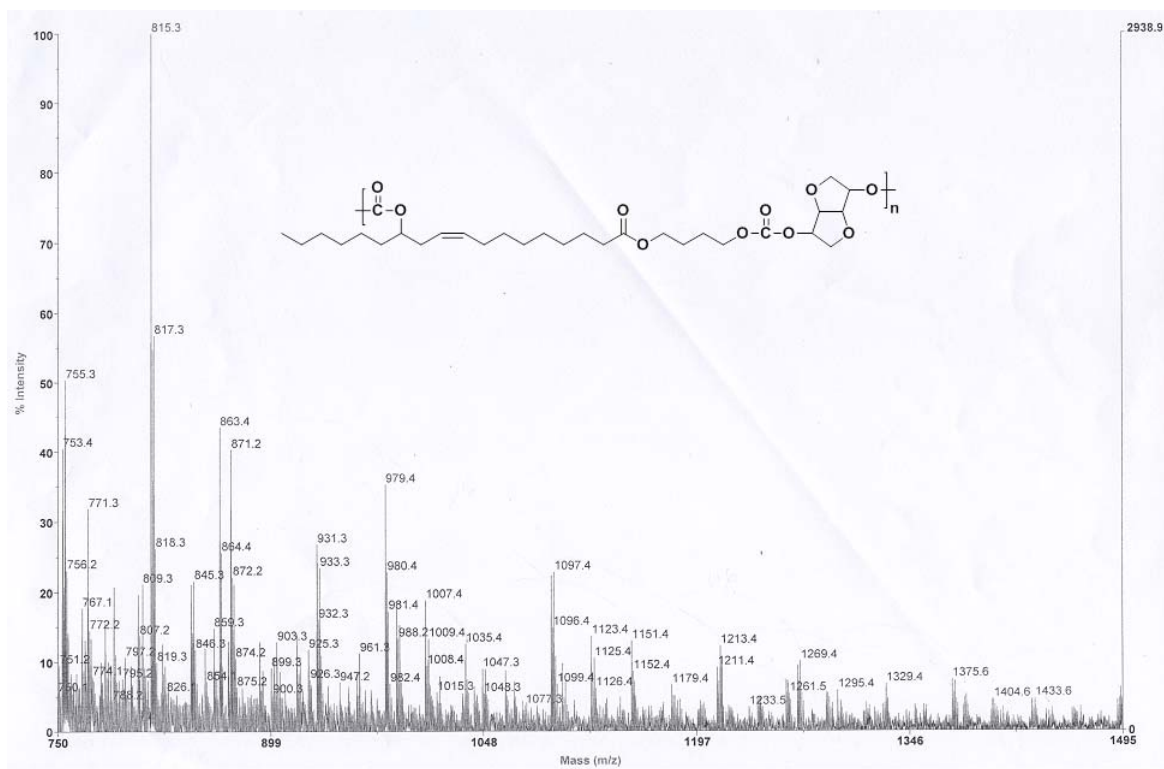

**Figure S19.** MALDI-TOF mass spectrum of poly(ester carbonate) (PEC-VII) derived by polycondensation of EOBEOE and Isosorbide

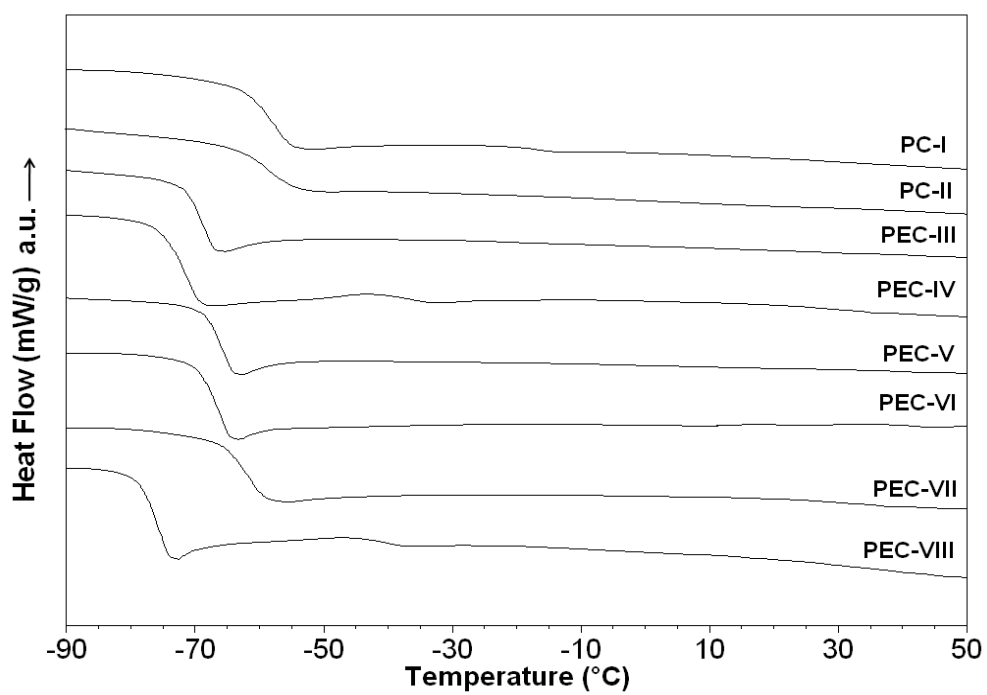

**Figure S20.** DSC curves of polycarbonates and poly(ester carbonate)s derived from EHMOC and EOBEOE, respectively

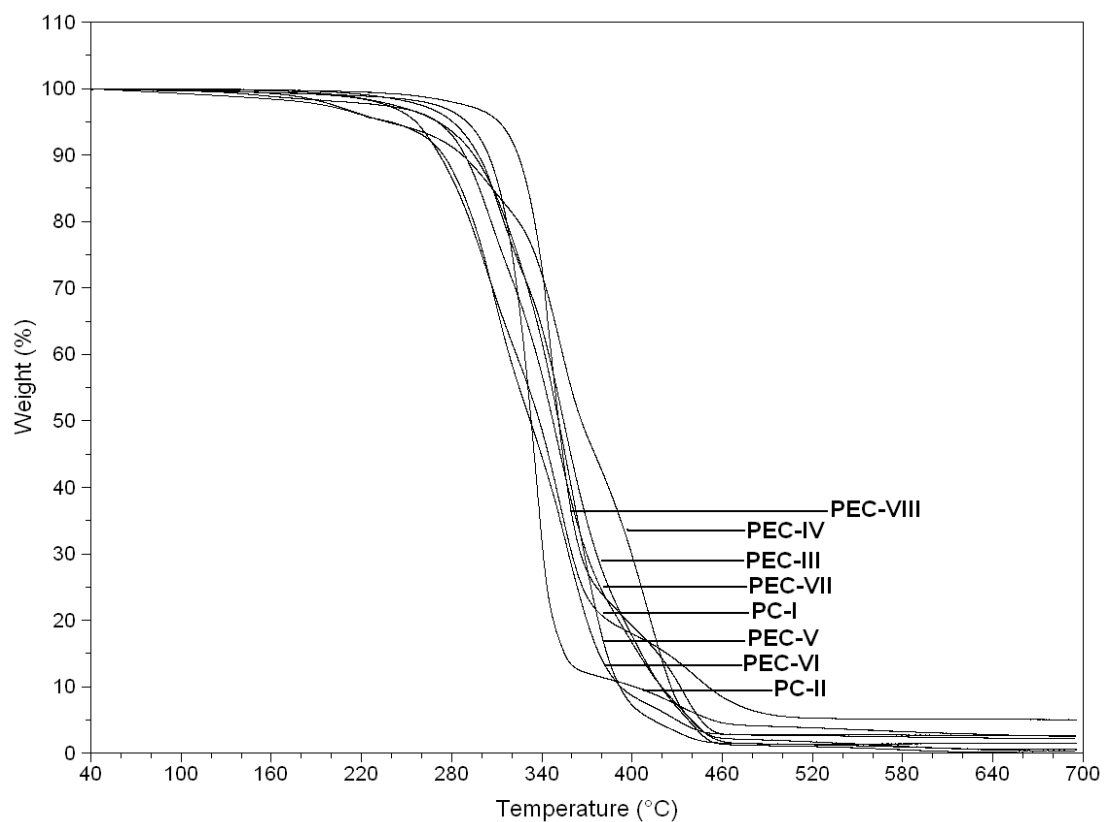

**Figure S21.** TGA curves of polycarbonates and poly(ester carbonate)s derived from EHMOC and EOBEOE, respectively
